# Supplementary material for: A nuanced approach for assessing OPV materials for large scale applications
Source: Royal Society of Chemistry journal article supplement (doi:10.1039/c9se01149h), 2019-12-04
Supplement: c9se01149h1.pdf [file c9se01149h1.pdf]

## Supplimentary infomation

# A nuanced approach for assessing OPV materials for large scale applications

Alaa Y. Al-Ahmad<sup>a,b</sup>, Furqan Almayhi<sup>a,c</sup>, Mohammed F. Al-Mudhaffer<sup>a,b</sup>, Matthew Griffith<sup>a</sup>, Wenqing Liu<sup>d</sup>, Shuixing Li<sup>d</sup>, Kamilla Sivunova<sup>a</sup>, Daniel Elkington<sup>a</sup>, Nathan A. Cooling<sup>a</sup>, Krishna Feron<sup>a</sup>, Minmin Shi<sup>d</sup>, Warwick Belcher<sup>a</sup>, Hongzheng Chen<sup>d</sup>, Thomas R. Andersen<sup>a\*</sup>, Paul Dastoor<sup>a</sup>.

<sup>a</sup> Centre for Organic Electronics, University of Newcastle, University Drive, Callaghan, Australia.

<sup>b</sup> Department of Physics, College of Education for Pure Science, University of Basrah, Iraq.

<sup>c</sup> Department of Physics, College of Science, University of Basrah, Iraq.

<sup>d</sup> Department of Polymer Science and Engineering, Zhejiang University.

Table S1: Cost calculation of the reaction components for SF(DPPB)<sub>4</sub>.

| Material                                                    | AUD/g or L | Unit | Usage for 100 g | Unit Price for 100 g acceptor | Price per g |          |
|-------------------------------------------------------------|------------|------|-----------------|-------------------------------|-------------|----------|
| 18-crown-6                                                  | AUD 5,080  | kg   | 23.4 g          | \$                            | 119         |          |
| 2-ethylhexyl bromide                                        | AUD 640    | kg   | 458.6 g         | \$                            | 294         |          |
| 2-thiophenecarbonitrile                                     | AUD 702    | kg   | 300.2 g         | \$                            | 211         |          |
| Acetic acid                                                 | AUD 7.20   | L    | 2.3 L           | \$                            | 17          |          |
| Phenylboronic acid                                          | AUD 318    | kg   | 64.9 g          | \$                            | 21          |          |
| Bis(pinacolato)diboron                                      | AUD 509    | kg   | 105.3 g         | \$                            | 54          |          |
| Chloroform                                                  | AUD 7.20   | L    | 16.1 L          | \$                            | 116         |          |
| dimethyl succinate                                          | AUD 109    | kg   | 134.0 g         | \$                            | 15          |          |
| N,N-Dimethylformamide anhydrous                             | AUD 12     | L    | 5.6 L           | \$                            | 70          |          |
| Ethanol                                                     | AUD 3.00   | L    | 1.2 L           | \$                            | 4           |          |
| potassium carbonate, anhydrous                              | AUD 176    | kg   | 922.8 g         | \$                            | 162         |          |
| Potassium acetate                                           | AUD 189    | kg   | 80.3 g          | \$                            | 15          |          |
| liquid nitrogen                                             | AUD 3      | kg   | 128.2 L         | \$                            | 385         |          |
| Methanol                                                    | AUD 2.75   | L    | 4.6 L           | \$                            | 13          |          |
| N-bromosuccinimide                                          | AUD 234    | kg   | 175.8 g         | \$                            | 41          |          |
| tetrakis(triphenylphosphine)palladium(0)                    | AUD 5,408  | kg   | 28.6 g          | \$                            | 155         |          |
| [1,1'-Bis(diphenylphosphino)ferrocene]dichloropalladium(II) | AUD 15,269 | kg   | 11.1 g          | \$                            | 169         |          |
| potassium tert-butoxide                                     | AUD 288    | kg   | 367.2 g         | \$                            | 106         |          |
| 2-methyl-2-butanol                                          | AUD 70     | L    | 3.0 L           | \$                            | 211         |          |
| 2,2',7,7'-Tetrabromo-9,9'-spirobifluorene                   | AUD 1,400  | kg   | 44.3 g          | \$                            | 62          |          |
| Tetrahydrofuran                                             | AUD 17.00  | L    | 4.2 L           | \$                            | 71          |          |
| Toluene                                                     | AUD 5.25   | L    | 19.4 L          | \$                            | 102         |          |
| Sum of reactants                                            |            |      |                 | \$                            | 2,408       | \$ 24.08 |
| Work-up                                                     |            |      |                 |                               |             |          |
| CH <sub>2</sub> Cl <sub>2</sub>                             | AUD 5.00   | L    | 184.45 L        | \$                            | 922         |          |
| ethyl acetate                                               | AUD 3.25   | L    | 108.76 L        | \$                            | 353         |          |
| hexane                                                      | AUD 5.00   | L    | 208.76 L        | \$                            | 1,044       |          |
| hexanes                                                     | AUD 7.37   | L    | 11.52 L         | \$                            | 85          |          |
| methanol                                                    | AUD 2.75   | L    | 13.86 L         | \$                            | 38          |          |
| MgSO <sub>4</sub>                                           | AUD 27     | kg   | 0.39 kg         | \$                            | 10          |          |
| Na <sub>2</sub> SO <sub>4</sub>                             | AUD 64     | kg   | 0.06 kg         | \$                            | 4           |          |
| petroleum ether                                             | AUD 7.20   | L    | 58.52 L         | \$                            | 421         |          |
| silica                                                      | AUD 10.2   | kg   | 111.34 kg       | \$                            | 1,133       |          |
| Sum of Work-up                                              |            |      |                 | \$                            | 4,011       | \$ 40.11 |
| Total sum for reactants and work-up                         |            |      |                 | \$                            | 6,419       | \$ 64.19 |

Table S 2: Cost calculation of the reaction components for [60]PCBM.

| Material                                   | AUD/g or L   | Unit | Usage for 100 g | Unit | Price for 100 g acceptor | Price per g     |
|--------------------------------------------|--------------|------|-----------------|------|--------------------------|-----------------|
| 4-benzoylbutyric acid                      | \$ 1,755.97  | kg   | 140.23 g        | g    | \$ 246.24                |                 |
| methanol                                   | \$ 2.75      | L    | 1.87 g          | g    | \$ 5.15                  |                 |
| hydrochloric acid                          | \$ 3.80      | L    | 0.03 g          | g    | \$ 0.11                  |                 |
| p-toluene-sulfonyl hydrazide               | \$ 35.63     | kg   | 149.92 L        | L    | \$ 5.34                  |                 |
| pyridine anhydrous                         | \$ 40.80     | L    | 4.83 g          | g    | \$ 196.94                |                 |
| sodium methoxide                           | \$ 152.00    | kg   | 36.20 L         | L    | \$ 5.50                  |                 |
| C60                                        | \$ 22,903.97 | kg   | 231.69 g        | g    | \$ 5,306.67              |                 |
| o-dichlorobenzene                          | \$ 17.20     | L    | 16.09 L         | L    | \$ 276.74                |                 |
| o-DCB                                      | \$ 17.20     | L    | 10.20 L         | L    | \$ 175.51                |                 |
| <b>Sum of reactants</b>                    |              |      |                 |      | <b>\$ 6,218</b>          | <b>\$ 62.18</b> |
| <b>Work-up</b>                             |              |      |                 |      |                          |                 |
| methanol                                   | \$ 2.75      | L    | 10.439 L        | L    | \$ 28.71                 |                 |
| silica                                     | \$ 10.18     | L    | 23.324 L        | L    | \$ 237.42                |                 |
| chlorobenzene                              | \$ 8.00      | L    | 23.324 L        | L    | \$ 186.59                |                 |
| toluene                                    | \$ 5.25      | L    | 93.295 L        | L    | \$ 489.80                |                 |
| <b>Sum of Work-up</b>                      |              |      |                 |      | <b>\$ 943</b>            | <b>\$ 9.43</b>  |
| <b>Total sum for reactants and work-up</b> |              |      |                 |      | <b>\$ 7,161</b>          | <b>\$ 71.61</b> |
